# Supplementary material for: Alignment of photoconductive self-assembled fibers composed of π-conjugated molecules under electric fields
Source: Royal Society of Chemistry journal article supplement (doi:10.1039/b915822g), 2009-11-05
Supplement: b915822g.pdf [file b915822g.pdf]

Electronic Supplementary Information (ESI) for

## Alignment of photoconductive self-assembled fibers composed of $\pi$ -conjugated molecules under electric fields

Yoshiko Shoji, Masafumi Yoshio,\* Takuma Yasuda, Masahiro Funahashi and Takashi Kato\*

*Department of Chemistry and Biotechnology, School of Engineering,  
The University of Tokyo, Hongo, Bunkyo-ku, Tokyo 113-8656, Japan*

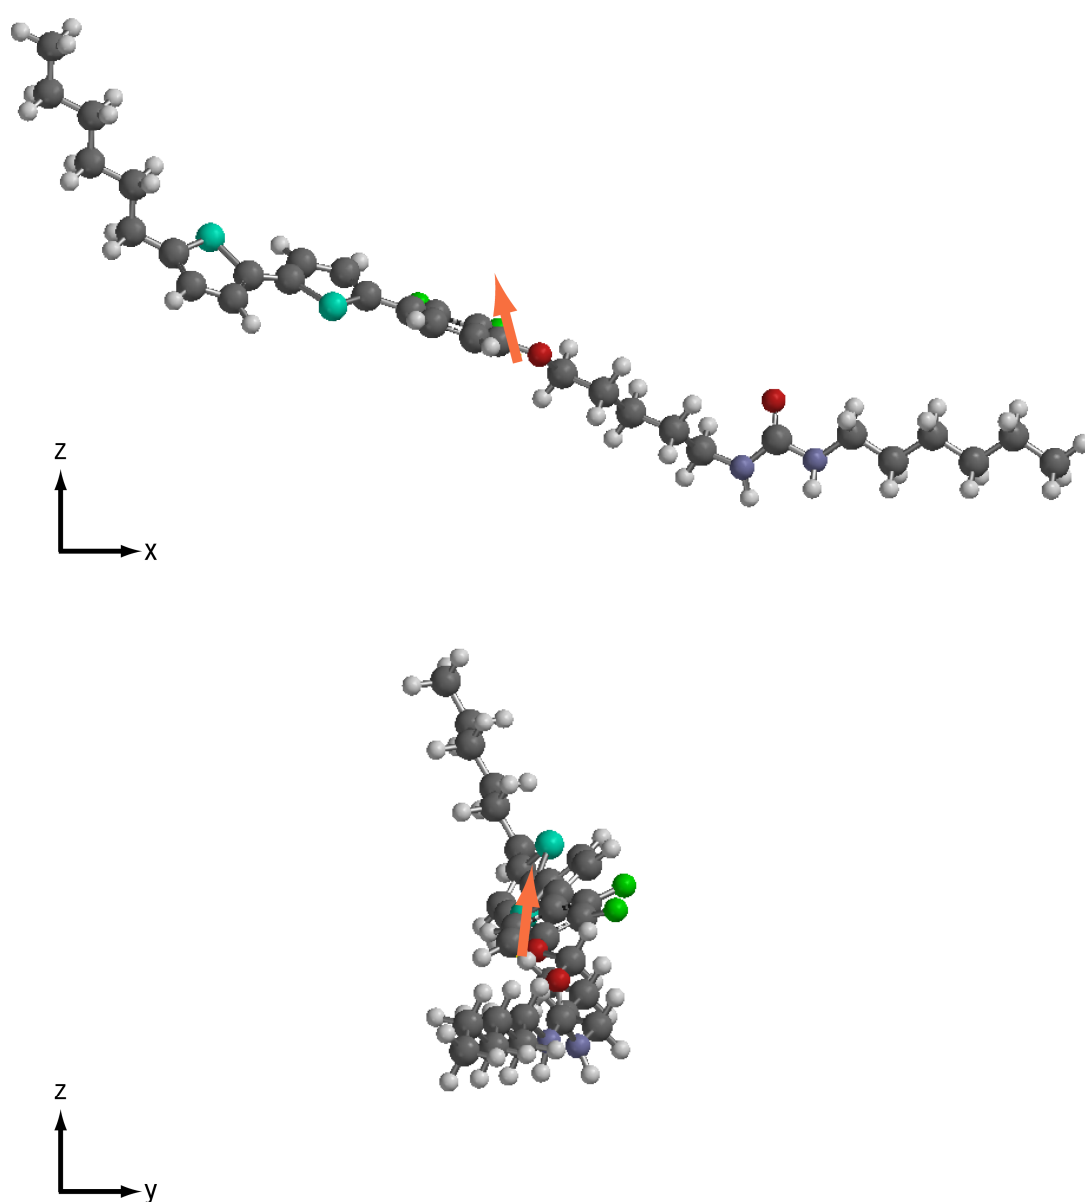

**Fig. S1** Molecular model of **1a** calculated at the B3LYP/6-31G\* level. The arrows indicate the direction of the dipole moment.

**Table S1** Gelation properties of compounds **1a** and **1b** in the concentration of 50 g L<sup>-1</sup>

| Solvent         | <b>1a</b>   | <b>1b</b>   |
|-----------------|-------------|-------------|
| Hexane          | Insoluble   | Insoluble   |
| Ethyl acetate   | Insoluble   | Insoluble   |
| Chloroform      | Precipitate | Precipitate |
| Dichloromethane | Precipitate | Insoluble   |
| Acetone         | Insoluble   | Insoluble   |
| Methanol        | Insoluble   | Insoluble   |
| Dodecylbenzene  | Gel         | Gel         |
| Dodecane        | Gel         | Gel         |

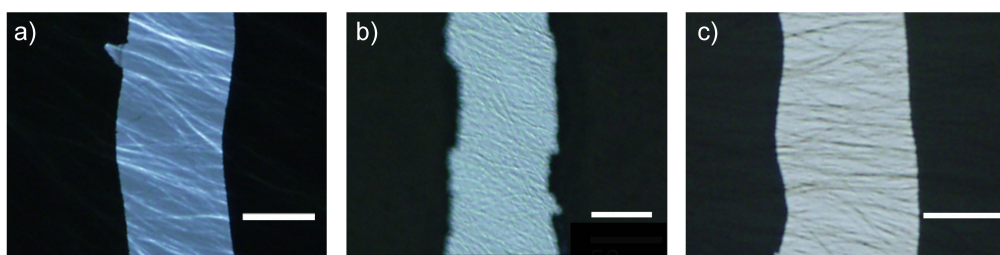

**Fig. S2** Optical photomicrographs of self-assembled fibers of **1a** in dodecylbenzene under applying an AC electric field (0.5 V/μm, 1 kHz). The concentration of **1a** in dodecylbenzene : (a) 20 g L<sup>-1</sup>, (b) 40 g L<sup>-1</sup> and (c) 50 g L<sup>-1</sup>. The scale bar indicates 50 μm.

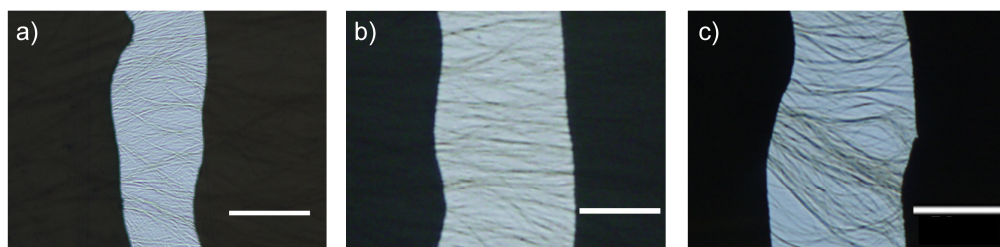

**Fig. S3** Optical photomicrographs of self-assembled fibers of **1a** in dodecylbenzene under applying AC electric fields at the frequency of 1 kHz: (a) 0.3 V/μm, (b) 0.5 V/μm, (c) 1.0 V/μm. The scale bar indicates 50 μm.

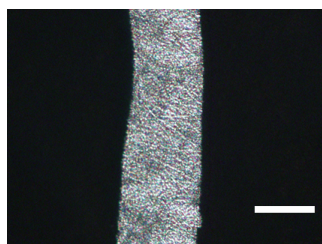

**Fig. S4** Optical photomicrograph of self-assembled fibers of **1b** in dodecylbenzene ( $50 \text{ g L}^{-1}$ ) under applying an AC electric field ( $0.5 \text{ V}/\mu\text{m}$ ,  $1 \text{ kHz}$ ). The scale bar indicates  $50 \mu\text{m}$ .

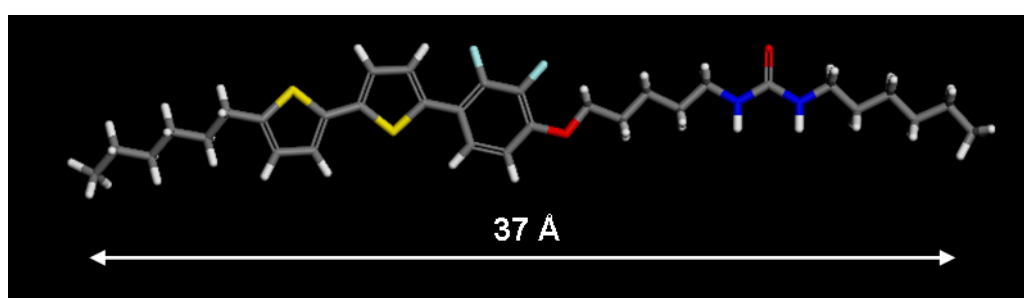

**Fig. S5** Energy minimized molecular structure of **1a** with a fully extended conformation.

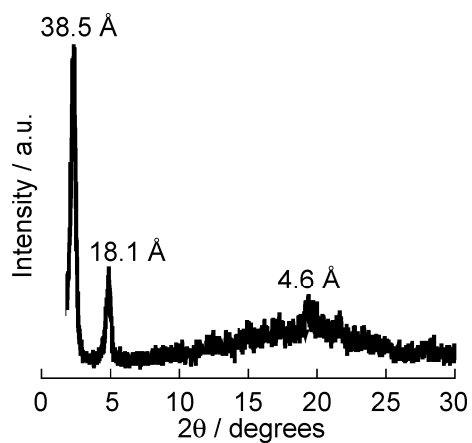

**Fig. S6** X-ray diffraction pattern of the xerogel of **1b** at room temperature. The xerogel sample was prepared by immersing the dodecylbenzene gel of **1b** ( $50 \text{ g L}^{-1}$ ) in hexane.

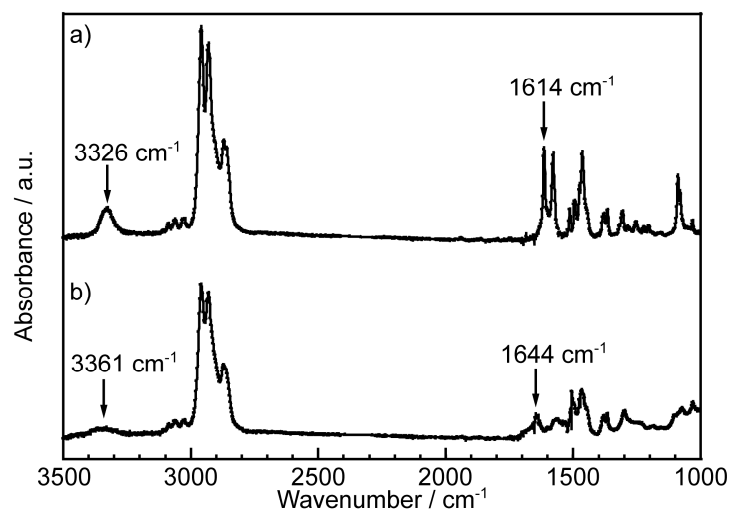

**Fig. S7** FT-IR spectra of **1a** in dodecylbenzene ( $50 \text{ g L}^{-1}$ ) in the gel state at room temperature (a) and in the sol state at  $135 \text{ }^\circ\text{C}$  (b).

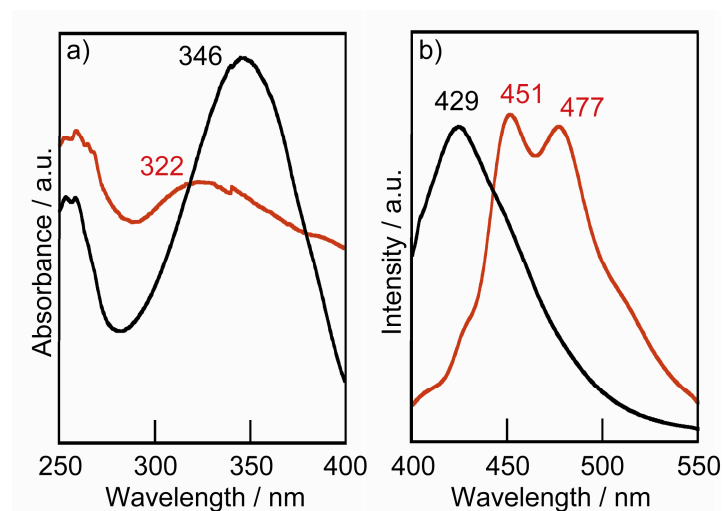

**Fig. S8** a) UV-vis absorption and b) fluorescence spectra of the mixture of **1a** and dodecylbenzene ( $50 \text{ g L}^{-1}$ ): the gel state at room temperature (red line), and the sol state at  $135 \text{ }^\circ\text{C}$  (black line).

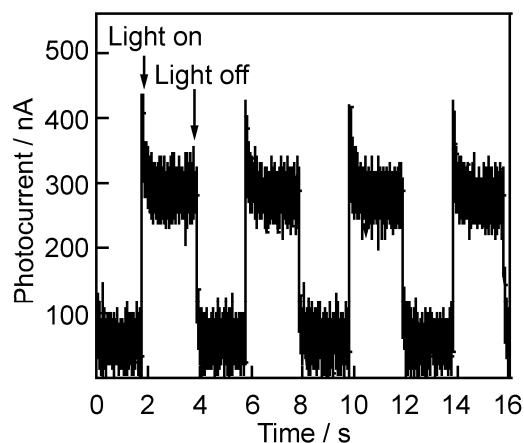

**Fig. S9** Photocurrent responses of the randomly entangled fibrous aggregates of **1a** in dodecylbenzene ( $50 \text{ g L}^{-1}$ ) at room temperature by the on-off irradiation of ultraviolet light ( $\lambda = 365 \text{ nm}$ ) from a high-pressure mercury lamp.

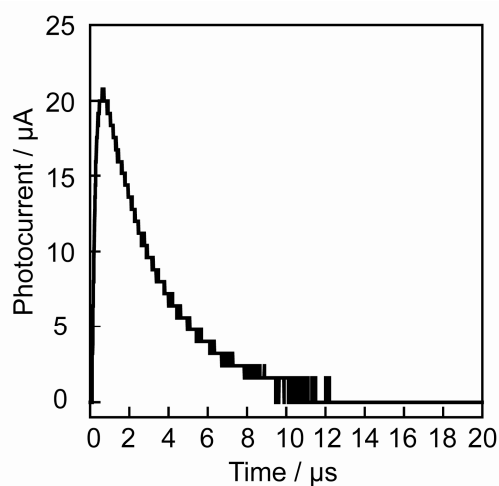

**Fig. S10** Transient photocurrent curve of the oriented fibers of **1a** in dodecylbenzene ( $50 \text{ g L}^{-1}$ ) at room temperature. The applied electric field is  $1 \text{ V}/\mu\text{m}$ .
